# Supplementary material for: Regulation of Arabidopsis gene expression by low fluence rate UV-B independently of UVR8 and stress signaling
Source: Royal Society of Chemistry journal article supplement (doi:10.1039/c9pp00151d), 2019-06-20
Supplement: c9pp00151d5.pdf [file c9pp00151d5.pdf]

| Locus ID     | Annotation                                                               |
|--------------|--------------------------------------------------------------------------|
| 1 AT3G15430  | Regulator of chromosome condensation (RCC1) family protein               |
| 2 AT1G10150  | carbohydrate-binding protein                                             |
| 3 AT1G68440  | transmembrane protein                                                    |
| 4 AT3G02750  | Protein phosphatase 2C family protein                                    |
| 5 AT5G59960  | K-stimulated pyrophosphate-energized sodium pump protein                 |
| 6 AT3G21390  | Mitochondrial thiamin diphosphate carrier                                |
| 7 AT5G65380  | MATE efflux family protein                                               |
| 8 AT1G33110  | MATE efflux family protein                                               |
| 9 AT2G36320  | A20/AN1-like zinc finger family protein                                  |
| 10 AT4G14930 | Survival protein SurE-like phosphatase/nucleotidase                      |
| 11 AT4G28300 | hydroxyproline-rich glycoprotein family protein                          |
| 12 AT3G04000 | ChIADR / short-chain dehydrogenase/reductase (SDR) family protein        |
| 13 AT4G27680 | P-loop containing nucleoside triphosphate hydrolases superfamily protein |
| 14 AT4G16000 | hypothetical protein                                                     |
| 15 AT1G21400 | Thiamin diphosphate-binding fold (THDP-binding) superfamily protein      |
| 16 AT1G09480 | alcohol dehydrogenase of unknown physiological function                  |
| 17 AT1G23040 | hydroxyproline-rich glycoprotein family protein                          |
| 18 AT1G19500 | hypothetical protein                                                     |
| 19 AT1G49470 | transmembrane epididymal protein (DUF716)                                |
| 20 AT2G30600 | BTB/POZ domain-containing protein                                        |
| 21 AT2G23840 | HNH endonuclease                                                         |
| 22 AT5G39080 | HXXXD-type acyl-transferase family protein                               |
| 23 AT1G05070 | transmembrane protein, putative (DUF1068)                                |
| 24 AT3G49790 | Carbohydrate-binding protein                                             |
| 25 AT4G37220 | Cold acclimation protein WCOR413 family                                  |
| 26 AT4G32870 | Polyketide cyclase/dehydrase and lipid transport superfamily protein     |
| 27 AT1G53870 | LURP-one-like protein (DUF567)                                           |
| 28 AT3G14560 | hypothetical protein                                                     |
| 29 AT5G35970 | P-loop containing nucleoside triphosphate hydrolases superfamily protein |
| 30 AT4G17245 | RING/U-box superfamily protein                                           |
| 31 AT5G13360 | Auxin-responsive GH3 family protein                                      |
| 32 AT4G22530 | S-adenosyl-L-methionine-dependent methyltransferases superfamily protein |
| 33 AT5G42940 | RING/U-box superfamily protein                                           |

|    |           |                                                                               |
|----|-----------|-------------------------------------------------------------------------------|
| 34 | AT5G51440 | HSP20-like chaperones superfamily protein                                     |
| 35 | AT1G54740 | FANTASTIC four-like protein (DUF3049)                                         |
| 36 | AT5G19440 | alcohol dehydrogenase of unknown physiological function                       |
| 37 | AT1G75810 | transmembrane protein                                                         |
| 38 | AT1G13990 | expressed protein                                                             |
| 39 | AT5G51260 | HAD superfamily, subfamily IIIB acid phosphatase                              |
| 40 | AT1G09500 | alcohol dehydrogenase of unknown physiological function                       |
| 41 | AT4G31140 | O-Glycosyl hydrolases family 17 protein                                       |
| 42 | AT1G68140 | zinc finger/BTB domain protein, putative (DUF1644)                            |
| 43 | AT1G03090 | methylcrotonyl-CoA carboxylase alpha chain, mitochondrial (MCCA)              |
| 44 | AT1G22400 | UDP-Glycosyltransferase superfamily protein (UGT85A1)                         |
| 45 | AT5G01520 | ABA INSENSITIVE RING PROTEIN 2 (AIRP2)                                        |
| 46 | AT3G24503 | ALDEHYDE DEHYDROGENASE 2C4 (ALDH2C4)                                          |
| 47 | AT1G54100 | ALDEHYDE DEHYDROGENASE 7B4 (ALDH7B4)                                          |
| 48 | AT2G37760 | ALDO-KETO REDUCTASE FAMILY 4 MEMBER C8 (AKR4C8)                               |
| 49 | AT1G64780 | AMMONIUM TRANSPORTER 1;2 (AMT1;2)                                             |
| 50 | AT2G39350 | ATP-BINDING CASSETTE G1 (ABCG1)                                               |
| 51 | AT5G49450 | BASIC LEUCINE-ZIPPER 1 (bZIP1)                                                |
| 52 | AT4G34610 | BEL1-like homeodomain 6 BLH6                                                  |
| 53 | AT3G13750 | beta-galactosidase BGAL1                                                      |
| 54 | AT4G27830 | BETA GLUCOSIDASE 10 (BGLU10)                                                  |
| 55 | AT5G64570 | BETA-D-XYLOSIDASE 4 (XYL4)                                                    |
| 56 | AT5G56870 | beta-galactosidase BGAL4                                                      |
| 57 | AT1G10070 | chloroplast branched-chain amino acid aminotransferase (BCAT-2)               |
| 58 | AT3G30180 | BRASSINOSTEROID-6-OXIDASE 2 (BR6OX2)                                          |
| 59 | AT1G72680 | cinnamyl-alcohol dehydrogenase CAD1                                           |
| 60 | AT2G42530 | COLD-REGULATED COR15B                                                         |
| 61 | AT2G42540 | COLD-REGULATED COR15A                                                         |
| 62 | AT3G28740 | CYTOCHROME P450, FAMILY 81, SUBFAMILY D, POLYPEPTIDE 11 (CYP81D11)            |
| 63 | AT3G13450 | branched chain alpha-keto acid dehydrogenase E1 beta; DARK INDUCIBLE 4 (DIN4) |
| 64 | AT3G13310 | Chaperone DnaJ-domain superfamily protein DJC66                               |
| 65 | AT4G36040 | Chaperone DnaJ-domain superfamily protein; DNAJ11                             |
| 66 | AT5G67190 | DREB AND EAR MOTIF PROTEIN 2 (DEAR2)                                          |
| 67 | AT5G54510 | DWARF IN LIGHT 1 (DFL1)                                                       |

|     |           |                                                              |
|-----|-----------|--------------------------------------------------------------|
| 68  | AT3G30775 | EARLY RESPONSIVE TO DEHYDRATION 5 (ERD5)                     |
| 69  | AT5G25350 | EIN3-binding F-box protein 2 (EBF2)                          |
| 70  | AT1G04310 | ETHYLENE RESPONSE SENSOR 2 (ERS2)                            |
| 71  | AT5G09440 | EXORDIUM like 4                                              |
| 72  | AT1G26770 | EXPANSIN EXPA10                                              |
| 73  | AT5G14470 | GHMP kinase family protein; GALACTOKINASE 2 (GALK2)          |
| 74  | AT1G61800 | GLUCOSE-6-PHOSPHATE/PHOSPHATE TRANSLOCATOR 2 (GPT2)          |
| 75  | AT5G07440 | GLUTAMATE DEHYDROGENASE 2 (GDH2)                             |
| 76  | AT3G47340 | GLUTAMINE-DEPENDENT ASPARAGINE SYNTHASE 1 (ASN1)             |
| 77  | AT2G29490 | GLUTATHIONE S-TRANSFERASE TAU 1 (GSTU1)                      |
| 78  | AT1G59700 | GLUTATHIONE S-TRANSFERASE TAU 16 (GSTU16)                    |
| 79  | AT1G17170 | GLUTATHIONE S-TRANSFERASE TAU 24 (GSTU24)                    |
| 80  | AT1G53580 | GLYOXALASE II 3 (GLY3)                                       |
| 81  | AT1G80160 | GLYOXYLASE I 7 (GLY17)                                       |
| 82  | AT5G19855 | HOMOLOGUE OF CYANOBACTERIAL RBCX 2 (RbcX2)                   |
| 83  | AT3G45300 | ISOVALERYL-COA-DEHYDROGENASE (IVD)                           |
| 84  | AT3G55970 | JASMONATE-REGULATED GENE 21 (JRG21)                          |
| 85  | AT1G15670 | KISS ME DEADLY 2 (KMD2)                                      |
| 86  | AT2G44130 | KISS ME DEADLY 3 (KMD3)                                      |
| 87  | AT3G59940 | KISS ME DEADLY 4 (KMD4)                                      |
| 88  | AT2G38530 | LIPID TRANSFER PROTEIN 2 (LTP2)                              |
| 89  | AT4G33150 | LYSINE-KETOGLUTARATE REDUCTASE (LKR)                         |
| 90  | AT1G29400 | MEI2-LIKE PROTEIN 5 (ML5)                                    |
| 91  | AT5G52900 | MEMBRANE-ASSOCIATED KINASE REGULATOR 6 (MAKR6)               |
| 92  | AT1G64660 | METHIONINE GAMMA-LYASE (MGL)                                 |
| 93  | AT1G05100 | MITOGEN-ACTIVATED PROTEIN KINASE KINASE KINASE 18 (MAPKKK18) |
| 94  | AT2G16720 | MYB DOMAIN PROTEIN 7 (MYB7)                                  |
| 95  | AT5G39610 | NAC DOMAIN CONTAINING PROTEIN 6 (NAC6)                       |
| 96  | AT5G13180 | NAC DOMAIN CONTAINING PROTEIN 83 (NAC083)                    |
| 97  | AT5G48180 | NITRILE SPECIFIER PROTEIN 5 (NSP5)                           |
| 98  | AT3G21670 | NRT1/ PTR FAMILY 6.4 (NPF6.4)                                |
| 99  | AT5G03555 | NUCLEOBASE CATION SYMPORTER 1 (NCS1)                         |
| 100 | AT3G26690 | NUDIX HYDROLASE HOMOLOG 13 (NUDX13)                          |
| 101 | AT2G02710 | PAS/LOV PROTEIN B (PLPB)                                     |

|     |           |                                                                                     |
|-----|-----------|-------------------------------------------------------------------------------------|
| 102 | AT5G20380 | PHOSPHATE TRANSPORTER 4;5 (PHT4;5)                                                  |
| 103 | AT4G32070 | PHOX4 (Phox4)                                                                       |
| 104 | AT1G06570 | PHYTOENE DESATURATION 1 (PDS1)                                                      |
| 105 | AT3G17810 | dihydropyrimidine dehydrogenase activity; PYRIMIDINE 1 (PYD1)                       |
| 106 | AT1G19510 | RAD-like 5                                                                          |
| 107 | AT5G13330 | ethylene response factor subfamily transcription factor RELATED TO AP2 6L (Rap2.6L) |
| 108 | AT1G27760 | SALT-TOLERANCE 32 (SAT32)                                                           |
| 109 | AT4G38860 | SMALL AUXIN UPREGULATED RNA 16 (SAUR16)                                             |
| 110 | AT5G54100 | STOMATIN-LIKE PROTEIN 2 (SLP2)                                                      |
| 111 | AT5G20830 | SUCROSE SYNTHASE 1 (SUS1)                                                           |
| 112 | AT1G08630 | THREONINE ALDOLASE 1 (THA1)                                                         |
| 113 | AT4G24040 | TREHALASE 1 (TRE1)                                                                  |
| 114 | AT4G34138 | UDP-glucosyl transferase 73B1                                                       |
| 115 | AT2G36750 | UDP-glucosyl transferase 73C1                                                       |
| 116 | AT3G46670 | UDP-glucosyl transferase 76E11                                                      |
| 117 | AT2G30140 | UDP-GLUCOSYL TRANSFERASE 87A2 (UGT87A2)                                             |
| 118 | AT4G34135 | UDP-GLUCOSYLTRANSFERASE 73B2 (UGT73B2)                                              |
| 119 | AT2G43820 | UDP-GLUCOSYLTRANSFERASE 74F2 (UGT74F2)                                              |
| 120 | AT5G58350 | WITH NO LYSINE (K) KINASE 4 (WNK4)                                                  |
| 121 | AT1G32170 | xyloglucan endotransglycosylase-related protein (XTR4)                              |
| 122 | AT3G23520 | cyclopropane fatty acid synthase, putative / CPA-FA synthase, putative              |
| 123 | AT1G75490 | DRE-binding transcription factor, putative                                          |
| 124 | AT2G16350 | F-box family protein                                                                |
| 125 | AT1G23430 | pyrrolidone-carboxylate peptidase family protein                                    |

**Table S3** Genes expressed in response to 0.3  $\mu\text{mol m}^{-2} \text{s}^{-1}$  UV-B independently of UVR8 and stress signaling (at 2% FDR).
